# Supplementary material for: Mapping the spatial distribution of NO 2 with in situ and remote sensing instruments during the Munich NO 2 imaging campaign
Source: Copernicus journal article supplement (doi:10.5194/amt-15-1609-2022), 2022-03-21
Supplement: Supplementary file 1 [file amt-15-1609-2022-supplement.zip]

Archive with 3 entries (3 files):
- amt-2021-303-supplement.pdf
- MuNIC-dataset-2016-07-07.zip
- amt-15-1609-2022-supplement-title-page.pdf
