# Supplementary material for: Mapping the spatial distribution of NO 2 with in situ and remote sensing instruments during the Munich NO 2 imaging campaign
Source: Copernicus journal article supplement (doi:10.5194/amt-15-1609-2022), 2022-03-21
Supplement: Supplementary file 1 [file amt-15-1609-2022-supplement.zip › amt-15-1609-2022-supplement-title-page.pdf]

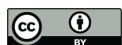

*Supplement of*

**Mapping the spatial distribution of NO<sub>2</sub> with in situ and remote sensing instruments during the Munich NO<sub>2</sub> imaging campaign**

**Gerrit Kuhlmann et al.**

*Correspondence to:* Gerrit Kuhlmann ([gerrit.kuhlmann@empa.ch](mailto:gerrit.kuhlmann@empa.ch))

- [amt-15-1609-2022-supplement-title-page.pdf](#)
- [MuNIC-dataset-2016-07-07.zip](#)
- [amt-2021-303-supplement.pdf](#)

The copyright of individual parts of the supplement might differ from the article licence.
